# Supplementary material
Source: PubMed Central journal article supplement (PMC3429544)
Supplement: auto-8-1071-s01.pdf [file auto-8-1071-s01.pdf]

## **Supplemental Material to:**

**Xiaolei Xie, Li Le, Yanxin Fan, Lin Lv and Junjie Zhang**

**Autophagy is induced through the ROS-TP53-DRAM1  
pathway in response to mitochondrial protein synthesis  
inhibition**

**Autophagy 2012; 8(7)**

**<http://dx.doi.org/10.4161/auto.20250>**

**[www.landesbioscience.com/journals/autophagy/article/20250](http://www.landesbioscience.com/journals/autophagy/article/20250)**

## Supplemental Material

### Autophagy is induced through the ROS-TP53-DRAM1 pathway in response to mitochondrial protein synthesis inhibition

Xiaolei Xie, Li Le, Yanxin Fan, Lin Lv and Junjie Zhang

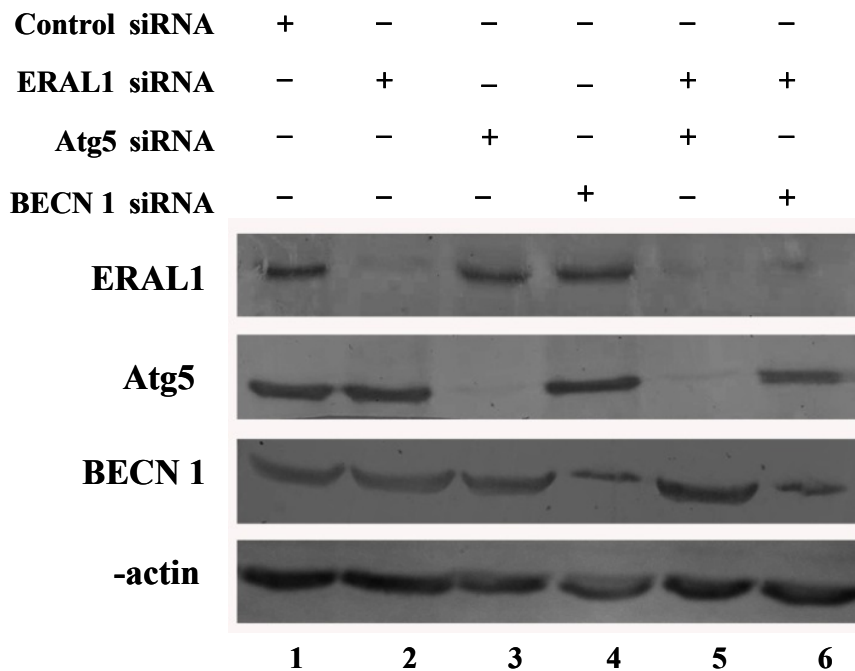

**Figure S1. The down-regulation effects of siRNAs.** HeLa cells were transfected with the indicated siRNA (s) against ERAL1, Atg5 or BECN1. Cells were harvested at 72 h post-siRNA transfection and subjected to Western blotting to detect the indicated proteins. Lane 1, control siRNA (100 nM); lane 2, *ERAL1* siRNA (50 nM) and control siRNA (50 nM); lane 3, *Atg5* siRNA (50 nM) and control siRNA (50 nM); lane 4, *BECN1* siRNA (50 nM) and control siRNA (50 nM); lane 5, *ERAL1* siRNA (50 nM) and *Atg5* siRNA (50 nM); lane 6, *ERAL1* siRNA (50 nM) and *BECN1* siRNA (50 nM).

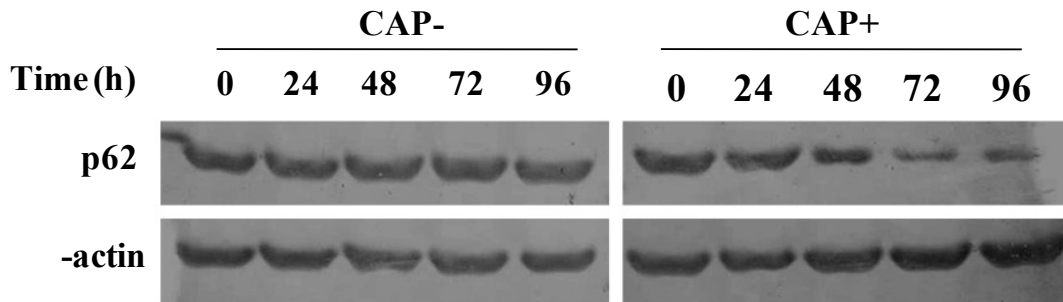

**Figure S2. SQSTM1/p62 protein levels are decreased in CAP-treated HCT116 *TP53*<sup>+/+</sup> cells.** HCT116 *TP53*<sup>+/+</sup> cells were treated with or without CAP (50 µg/ml). At indicated time point post-CAP treatment, SQSTM1/p62 protein levels were detected by western blot.

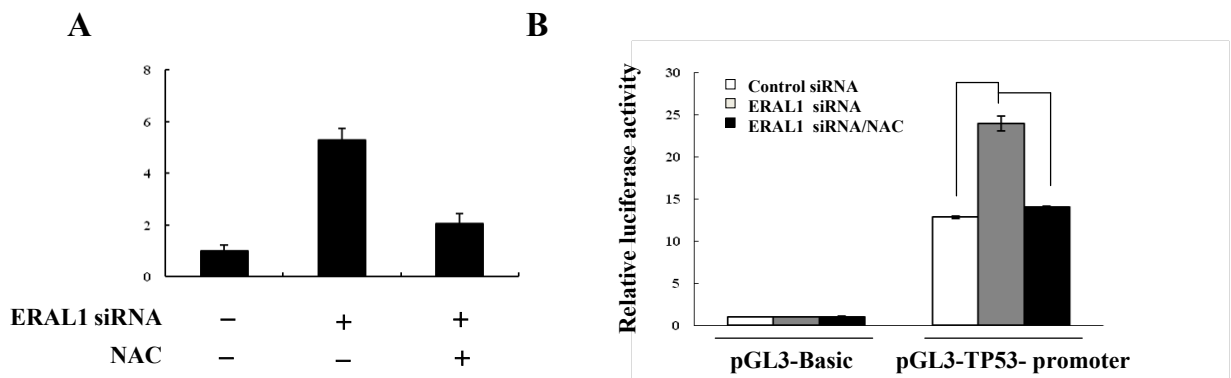

**Figure S3. ROS increase *TP53* (Tumor Protein 53) expression at transcriptional level by enhancing *TP53* promoter activity in *ERAL1* siRNA-treated cells.** (A) HeLa cells were transfected with control siRNA or *ERAL1* siRNA in the presence or absence of NAC as indicated. *TP53* mRNA levels were analyzed by Real-Time PCR at 72 h post-siRNA transfection. (B) HeLa cells were transfected with pGL3-Basic vector or pGL3-TP53-promoter together with  $\beta$ -gal expressing plasmid, and then transfected with control siRNA or *ERAL1* siRNA in the presence or absence of NAC as indicated. Luciferase activity was measured at 72 h post-siRNA transfection and normalized to plasmid transfection efficiency with  $\beta$ -galactosidase activity as internal control. Representative data were from three independent experiments. The p value derived from Student's t test is (\*\*)  $p < 0.001$ .

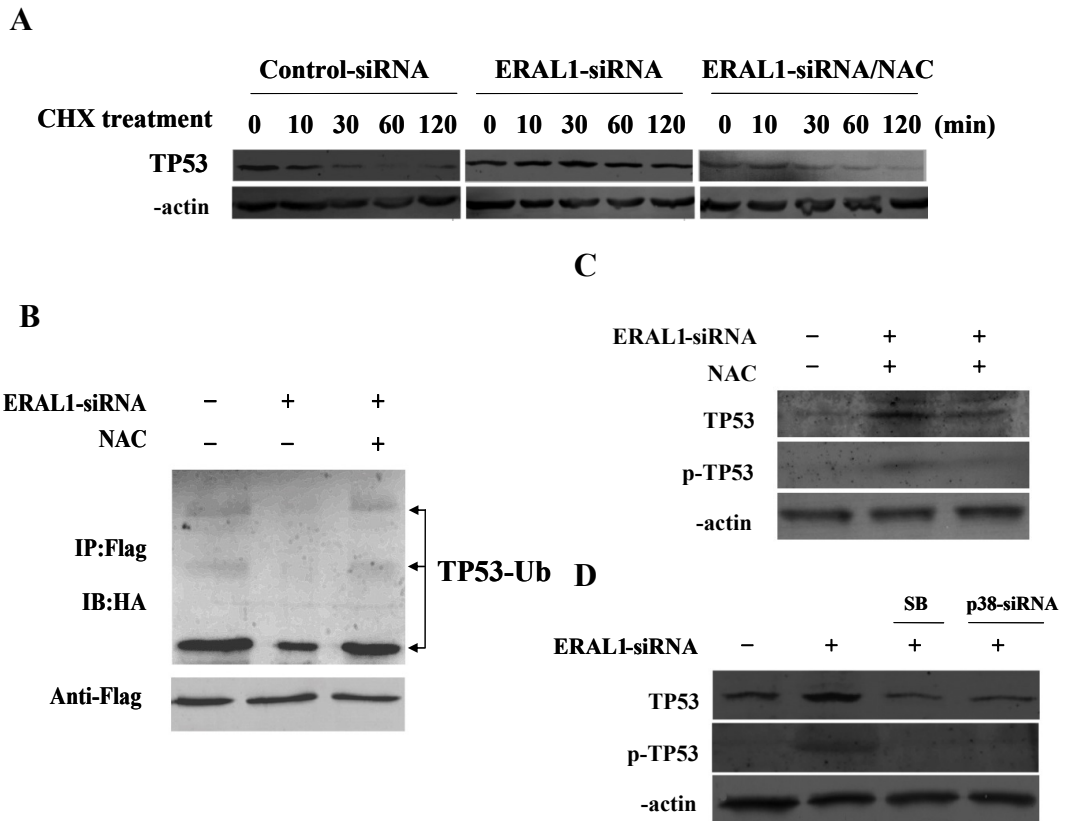

**Figure S4. TP53 is activated at post-translational level through the ROS-MAPK14/p38 pathway in *ERAL1* siRNA-treated cells.** (A) TP53 stability in HeLa cells with ERAL1 knockdown. HeLa cells were transfected with *ERAL1* siRNA in the absence or presence of NAC. At 72 h post-siRNA transfection, cells were treated with CHX (20  $\mu$ M). TP53 protein levels were detected by western blotting at indicated time points after the addition of CHX. (B) TP53 ubiquitination in HeLa cells with ERAL1 knockdown. HeLa cells cotransfected with HA-ubiquitin and TP53-Flag plasmid were transfected with *ERAL1* siRNA in the absence or presence of NAC. At 72 h post-siRNA transfection, cells were treated with MG132 for 2 h, and then subjected to immunoprecipitation with anti-Flag agarose beads, followed by western blot analysis with anti-HA antibody to detect ubiquitinated proteins (top panel), and with anti-Flag antibody to determine the TP53-Flag levels (bottom panel). (C) TP53 phosphorylation in HeLa cells with *ERAL1* knockdown. HeLa cells were transfected with ERAL1 siRNA in the absence or presence of NAC. At 72 h post-siRNA transfection, cells were subjected to western blotting to detect the levels of TP53 and

p-TP53 (Ser15) respectively. **(D)** The role of MAPK14/p38 in TP53 phosphorylation in HeLa cells with ERAL1 knockdown. HeLa cells were treated with ERAL1 siRNA for 72 h together with MAPK14 inhibitor SB202190 (SB) or *MAPK14*-specific siRNA, and then subjected to western blotting to detect the levels of TP53 and p-TP53 (Ser15) respectively.

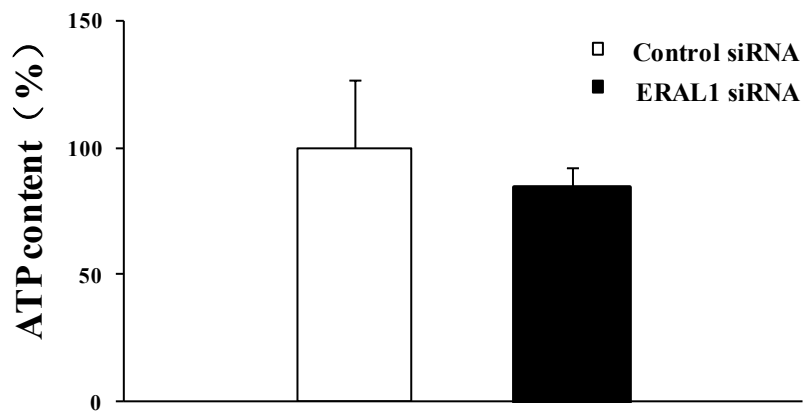

**Figure S5. Intracellular ATP levels in *ERAL1* siRNA or control siRNA-treated HeLa cells.** HeLa cells were cultured in normal DMEM medium and transfected with *ERAL1* siRNA or control siRNA respectively. Intracellular ATP levels were measured 72 h post-siRNA transfection with the ATP-Lite Assay Kit (TOO7) according to the manufacturer's direction (Vigorous Biotechnology, China).

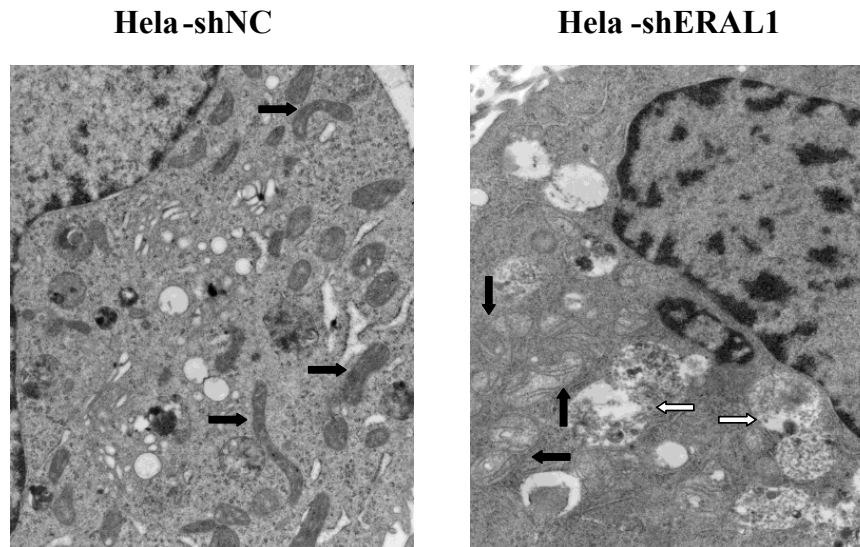

**Figure S6.** Electron-microscope pictures of HeLa cells with stably expression of ERAL1-shRNA (Hela-shERAL1) or scramble shRNA (Hela-shNC). Solid arrows represent mitochondria, and empty arrows represent autophagic vacuoles.

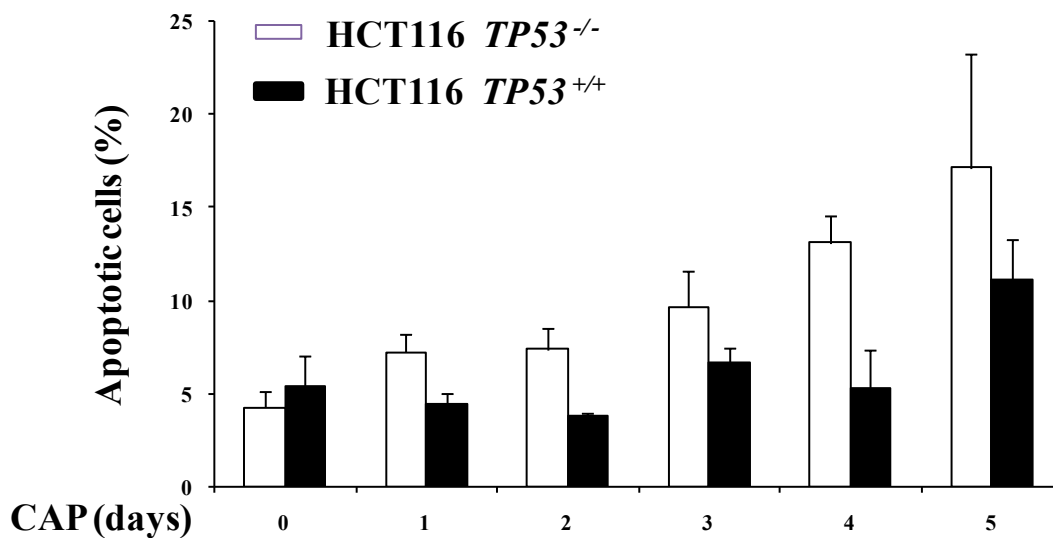

**Figure S7.** Analysis of apoptosis in CAP-treated HCT116 *TP53*<sup>+/+</sup> and HCT116 *TP53*<sup>-/-</sup> cells. HCT116 *TP53*<sup>+/+</sup> and HCT116 *TP53*<sup>-/-</sup> cells were treated with CAP (50 µg/ml) for the indicated time, and then fixed overnight in 70% ethanol. The cells were washed twice with PBS and incubated in PBS containing RNase A (10 µg/ml) for 30 min at 37°C. The cells were then stained with propidium iodide (0.5 mg/ml) for 30 min at 4°C. The percentage of apoptotic cells were identified by the sub-G1 DNA content measured with flow cytometry.
